# Supplementary material
Source: publisher figshare collection journal article supplement (https://f1000.figshare.com/ndownloader/files/8552632)
Supplement: Supplementary file 1 [file 8552632]

## Sheet: Sheet1
A new version of this article has been published to replace Dataset 1 , as the data included had not been anonymised. The updated dataset is now anonymised
